# Supplementary material for: Hypoxia-related gene FUT11 promoted pancreatic cancer progression via maintaining the stabilization of PDK1
Source: Research Square preprint supplement (doi:10.21203/rs.3.rs-152464/v3), 2021-02-18
Supplement: Supplementary file 1 [file aa79f1be564608282e5a9801.xlsx]

## Sheet: Sheet1
FUT11 Expression
Features		n	Low	High	X²	P-value
All cases		90	45	45
Age					0.413	0.52
	＜60	53	28	25
	≥60	37	17	20
Gender					2.217	0.136
	Man	51	29	22
	Female	39	16	23
Tumor size(cm)					6.403	0.011
	＜2	44	16	28
	≥2	46	29	17
Lymph node metastasis					10.08	0.001
	Negative	41	28	13
	Positive	49	17	32
TNM stage					10.02	0.002
	Ⅰand Ⅱ	43	29	14
	Ⅲ and Ⅳ	47	16	31
Distant metastasis					16.335	<0.001
	Negative	39	29	10
	Positive	51	16	35
Perineural invasion					11.52	0.001
	Negative	40	28	12
	Positive	50	17	33
Blood vessel invasion					8.75	0.003
	Negative	42	28	14
	Positive	48	17	31
